# Supplementary material for: Phthalate Exposure Pattern in Breast Milk within a Six-Month Postpartum Time in Southern Taiwan
Source: MDPI journal article supplement (doi:10.3390/ijerph18115726), 2021-05-26
Supplement: s1 [file s1]

# Phthalate Exposure Pattern in Breast Milk Within a Six-Month Postpartum Time in Southern Taiwan

Shen-Che Hung†, Ting-I Lin†, Jau-Ling Suen, Hsien-Kuan Liu, Pei-Ling Wu, Chien-Yi Wu, Yu-Chen S.H. Yang, San-Nan Yang and Yung-Ning Yang\*

**Supplementary Table S1.** LOD, LOQ, and linear range of phthalate metabolites

|       | LOD <sup>1</sup> (ng/mL) | LOQ <sup>2</sup> (ng/mL) | linear range (ng/mL) | correlation coefficient |
|-------|--------------------------|--------------------------|----------------------|-------------------------|
| MEHHP | 0.15                     | 0.5                      | 0.5~1000             | R <sup>2</sup> = 0.9998 |
| MECPP | 0.15                     | 0.5                      | 0.5~1000             | R <sup>2</sup> = 0.9999 |
| MEOHP | 0.15                     | 0.5                      | 0.5~1000             | R <sup>2</sup> = 0.9997 |
| MEHP  | 0.15                     | 0.5                      | 0.5~1000             | R <sup>2</sup> = 0.9988 |
| MBZP  | 0.3                      | 1                        | 1~1000               | R <sup>2</sup> = 0.9999 |
| MIBP  | 0.6                      | 2                        | 2~1000               | R <sup>2</sup> = 0.9985 |
| MBP   | 0.6                      | 2                        | 2~1000               | R <sup>2</sup> = 0.9994 |
| MCMHP | 0.3                      | 1                        | 1~1000               | R <sup>2</sup> = 0.9994 |

<sup>1</sup>Limit of detection (LOD) was calculated at signal-to-noise ratio (S/N) = 3.

<sup>2</sup>Limit of quantitation (LOQ) was calculated at signal-to-noise ratio (S/N) = 10.
